1 **Increased infection risk in Addison's disease and congenital adrenal hyperplasia: a**  
2 **primary care database cohort study**

3 Alberto S. Tresoldi<sup>1,2,3</sup>, Dana Sumilo<sup>4</sup>, Mary Perrins<sup>4</sup>, Konstantinos A. Toulis<sup>4</sup>, Alessandro  
4 Prete<sup>1,2</sup>, Narendra Reddy<sup>5</sup>, John A.H. Wass<sup>6</sup>, Wiebke Arlt<sup>1,2,7\*#</sup>, Krishnarajah Nirantharakumar<sup>4\*</sup>

5 \*joint senior authors #corresponding author

6 <sup>1</sup>Institute of Metabolism and Systems Research, College of Medical and Dental Sciences,  
7 University of Birmingham, Birmingham, United Kingdom

8 <sup>2</sup>Centre for Endocrinology, Diabetes and Metabolism, Birmingham Health Partners, Birmingham,  
9 United Kingdom

10 <sup>3</sup>Endocrinology, Diabetology and Medical Andrology Unit, Humanitas Research Hospital,  
11 Rozzano (Milan), Italy

12 <sup>4</sup>Institute of Applied Health Research, College of Medical and Dental Sciences, University of  
13 Birmingham, Birmingham, United Kingdom

14 <sup>5</sup>Department of Diabetes & Endocrinology, University Hospitals of Leicester NHS Trust,  
15 Leicester Royal Infirmary, Leicester, UK

16 <sup>6</sup>Oxford Centre for Diabetes, Endocrinology and Metabolism, Churchill Hospital, Oxford, United  
17 Kingdom

18 <sup>7</sup>NIHR Birmingham Biomedical Research Centre, University Hospitals Birmingham NHS  
19 Foundation Trust and University of Birmingham, Birmingham, UK

20 **Short title:** Infection risk in primary adrenal insufficiency

21 **Keywords:** primary adrenal insufficiency · Addison's disease · congenital adrenal hyperplasia ·  
22 infections · antimicrobials · primary care

23 **Please address all correspondence to:**

24 Professor Wiebke Arlt

25 Institute of Metabolism and Systems Research

26 College of Medical and Dental Sciences

27 University of Birmingham

28 Medical School IBR Tower, Rm 236

29 Birmingham, B15 2TT, United Kingdom

30 Email [w.arlt@bham.ac.uk](mailto:w.arlt@bham.ac.uk)

31 **Funding:** This work was supported by the Medical Research Council UK (Program Grant  
32 0900567, to W A). K.N. is a UK Research and Innovation (UKRI)/Health Data Research (HDR)  
33 UK Innovation Clinical Fellow. W.A. receives support from the National Institute of Health  
34 Research (NIHR) Birmingham Biomedical Research Centre. The views expressed in this  
35 publication are those of the authors and not necessarily those of the NIHR or the Department of  
36 Health and Social Care UK.

37 **Disclosure Statement:** W.A. serves as scientific consultant to Diurnal Ltd. and Spruce  
38 Biosciences Inc. All other authors have no conflict of interest to declare.

39 **Word count:** 3479

40 **ABSTRACT**

41 **Context:** Mortality and infection-related hospital admissions are increased in patients with  
42 primary adrenal insufficiency (PAI). However, the risk of primary care-managed infections in  
43 patients with PAI is unknown.

44 **Objective:** To estimate infection risk in PAI due to Addison's disease (AD) and congenital  
45 adrenal hyperplasia (CAH) in a primary care setting.

46 **Design:** Retrospective cohort study using UK data collected from 1995 to 2018.

47 **Main outcome measures:** Incidence of lower respiratory tract infections (LRTIs), urinary tract  
48 infections (UTIs), gastrointestinal infections (GIs), and prescription counts of antimicrobials in  
49 adult PAI patients compared to unexposed controls.

50 **Results:** A diagnosis of PAI was established in 1580 AD patients (mean age 51.7 years) and  
51 602 CAH patients (mean age 35.4 years). All AD patients and 42% of CAH patients were  
52 prescribed glucocorticoids, most frequently hydrocortisone in AD (82%) and prednisolone in  
53 CAH (50%). AD and CAH patients exposed to glucocorticoids, but not CAH patients without  
54 glucocorticoid treatment, had a significantly increased risk of LRTIs (adjusted incidence rate  
55 ratio AD 2.11 [95% confidence interval 1.64-2.69], CAH 3.23 [1.21-8.61]), UTIs (AD 1.51 [1.29-  
56 1.77], CAH 2.20 [1.43-3.34]), and GIs (AD 3.80 [2.99-4.84], CAH 1.93 [1.06-3.52]). This was  
57 mirrored by increased prescription of antibiotics (AD 1.73 [1.69-1.77], CAH 1.77 [1.66-1.89]) and  
58 antifungals (AD 1.89 [1.74-2.05], CAH 1.91 [1.50-2.43]).

59 **Conclusions:** There is an increased risk of infections and antimicrobial use in PAI in the  
60 primary care setting at least partially linked to glucocorticoid treatment. Future studies will need  
61 to address whether more physiological glucocorticoid replacement modes could reduce this risk.

62 **Précis**

63 Using data from 1580 AD patients and 602 CAH patients collected in a UK primary care  
64 database from 1995 to 2018, we identified increased risk of infections and antimicrobial  
65 prescription counts.

66 **INTRODUCTION**

67 Primary adrenal insufficiency (PAI) is a severe and potentially life-threatening condition caused  
68 by the failure of the adrenal cortex to produce glucocorticoids and, in most cases,  
69 mineralocorticoids, which occurs in the setting of adrenal disease (1). The two most frequent  
70 causes of PAI are autoimmune adrenalitis, the most frequent cause of Addison's disease, AD, in  
71 Western countries, and congenital adrenal hyperplasia (CAH).

72 The prognosis of patients with PAI has improved considerably after life-saving glucocorticoid  
73 replacement therapy became available in the 1950s; however, an increased risk of death has  
74 been described in both AD and CAH patients even in recent years (2,3). In patients with AD, this  
75 has been attributed to adrenal crisis- and infection-related mortality (4), while for both CAH and  
76 AD patients an increased cardiovascular-related mortality has been described (3,4). Other  
77 studies have reported an increased use of antimicrobial agents and infection-related hospital  
78 admissions in patients with PAI (5,6). Recent evidence suggests that the increased risk of  
79 infections in these patients could be explained by an impairment of natural killer cell function (7),  
80 which may be caused by the non-physiological delivery of glucocorticoids by currently available  
81 preparations and an associated change in clock gene expression patterns in immune cells (7,8).

82 No studies have estimated yet the overall risk of common infections in people with PAI, i.e.  
83 infections that are primarily managed in the primary care setting and usually do not require  
84 hospital admission. However, such infections potentially expose PAI patients to significant risk  
85 of adrenal crisis. Therefore, this study aimed to assess the risk of common types of primary  
86 care-managed infections, namely infections of the lower respiratory tract, the urinary tract, and

- 87 gastrointestinal infections, and the use of antimicrobials in the primary care setting in patients
- 88 with PAI, including both AD and CAH patients with and without glucocorticoid therapy.

## 89 MATERIALS AND METHODS

### 90 *Study design and setting*

91 We conducted a population-based, retrospective, open cohort study to determine the infection  
92 risk of patients with AD and CAH in the primary care setting. We assessed the risk of lower  
93 respiratory tract infections (LRTIs), urinary tract infections (UTIs), gastrointestinal infections  
94 (GIs), and the counts of antimicrobial prescriptions. We used data from The Health  
95 Improvement Network (THIN) database, comprising anonymized electronic medical records  
96 from UK general practitioner (GP) practices covering over 5% of the UK population. THIN holds  
97 data on demographic characteristics, clinical diagnoses, physical measurements, laboratory  
98 results and drug prescriptions recorded using clinical Read code system. Patients registered in  
99 THIN have similar age and sex distributions to the general UK population and, therefore, THIN  
100 data are well suited for epidemiological studies (9,10).

### 101 *Study population and period*

102 Our study population consisted of two “exposed” cohorts, comprising adult patients ( $\geq 18$  years  
103 old) diagnosed with AD or CAH according to selected Read codes (see Appendix for the codes  
104 used) (11,12). We excluded patients who were at any time point coded with a code consistent  
105 with other causes of adrenal insufficiency. We could not retrieve data on 21-hydroxylase  
106 autoantibodies in the study participants, due to the nature of the study. Therefore, in this paper,  
107 we defined AD as primary adrenal insufficiency not caused by CAH. To ensure accuracy of case  
108 definition in the AD cohort we only included patients who had at least one prescription of both  
109 glucocorticoids (accepting glucocorticoids commonly used in AD) and mineralocorticoids. We  
110 also performed a sensitivity analysis to include only patients who had at least two prescription of  
111 both glucocorticoids and mineralocorticoids. We subdivided the CAH cohort in two sub-cohorts:  
112 (a) patients who had at least one glucocorticoid prescription at any point (using the same  
113 glucocorticoid codes used for AD patients) and (b) patients who were never prescribed with any

114 glucocorticoid therapy, since patients with CAH do not always require glucocorticoid therapy.  
115 For every exposed patient, we randomly selected two individuals from a pool of patients  
116 matched for age, sex and GP practice who did not have a Read code consistent with PAI at any  
117 point before or during the observation period.

118 The study period extended from 1 January 1995 to 1 January 2018. Patients were eligible for  
119 inclusion one year from the latest of the following dates: study start date, patient registration  
120 date with the GP practice, and practice eligibility date (the date when practices have  
121 implemented an electronic medical record and have passed the assessment for acceptable data  
122 quality). The one-year lag period was applied to ensure there was enough time to document all  
123 information accurately after registration with the practice or after a practice was deemed eligible  
124 to take part. To ensure acceptable data quality, practices were required to have used the  
125 electronic health record system for at least one year and have acceptable mortality reporting  
126 (13).

127 The index date, i.e. the date when follow-up commences, was defined as the date of diagnosis  
128 for newly diagnosed patients or, if they were already diagnosed with PAI, the date when they  
129 registered with an eligible GP practice. Patients were followed from index date up until the  
130 earliest of the following dates: outcome of interest (only for estimating the incidence of  
131 infections), patient transfer date from practice, patient death, practice's last data collection date,  
132 and study end date.

### 133 **Outcomes**

134 For the first outcome, the incidence of infections, we used the Read codes that identify cases of  
135 LRTIs, UTIs and GIs (see Suppl. Appendix). These infections were chosen because they are  
136 the most common type of infections evidenced in general population and they are frequently  
137 diagnosed in primary care (14). We then calculated the occurrence of this outcome in the  
138 different cohorts.

139 For the second outcome, antimicrobial use, we used the codes for antibiotics and antifungals as  
140 classified in the British National Formulary. We then calculated the total number of prescriptions  
141 for every antimicrobial in each cohort.

142 For each of the study groups we analyzed age, sex, body mass index (BMI), smoking status,  
143 Townsend Deprivation Index (a measure of deprivation within a population) (15), Charlson  
144 Comorbidity Index (a method of classifying comorbidities to predict mortality in primary care)  
145 (16,17), and type of glucocorticoids prescribed at baseline. For the AD cohort (in which most  
146 patients were likely to have autoimmune PAI), given the frequent association with other  
147 autoimmune conditions, we also evaluated the prevalence of associated autoimmune  
148 comorbidities.

#### 149 ***Statistical analysis***

150 Descriptive statistics were used to summarize the baseline characteristics for the exposed and  
151 unexposed groups of patients. Categorical variables were investigated using Chi-square test  
152 and continuous variables were analyzed using t-test.

153 Adjusted incidence rate ratios (aIRRs) for specific infections and antimicrobial prescriptions  
154 were calculated after adjustment for age, sex, smoking status, BMI, Townsend Deprivation  
155 Index, and Charlson Comorbidity Index, using multivariate Poisson regression analysis.  
156 Statistical analyses were conducted using Stata version 14.2 (Stata Corp, College Station  
157 Texas, USA) and GraphPad Prism 7.04 (GraphPad Software Inc, San Diego, CA).

#### 158 ***Ethical approval***

159 The THIN database obtained ethical approval from the South East Multicentre Research Ethics  
160 Committee in 2003. The present study was reviewed and approved (study reference:  
161 18THIN063) by the THIN Scientific Review Committee in July 2018.



## 162 RESULTS

### 163 ***Baseline characteristics of the AD cohort***

164 In total, 1580 patients fulfilled the AD criteria; these were matched with 3158 unexposed  
165 individuals (Table 1). The mean age of AD patients was 51.7 years and the majority were  
166 women (57.8%). Compared to unexposed individuals, AD patients had a lower median BMI,  
167 while the Townsend Deprivation Index did not differ significantly between the two groups. The  
168 Charlson Comorbidity Index showed that AD patients had an increased burden of comorbidities  
169 compared to the matched population; this included a higher prevalence of autoimmune  
170 comorbidities, including autoimmune thyroid diseases, type 1 diabetes mellitus, ulcerative  
171 colitis, celiac disease and pernicious anemia (Table 1).

### 172 ***Baseline characteristics of the CAH cohort***

173 In total, 602 patients fulfilled the CAH criteria and were subdivided into 254 glucocorticoid-  
174 treated patients (42.2%) and 348 patients not on glucocorticoids (57.8%). These were matched  
175 with 508 and 696 unexposed controls, respectively (Table 2).

176 The majority of CAH patients were female (72.3%), with a lower mean age in glucocorticoid-  
177 treated patients at cohort entry (33.4 vs. 36.9 years). CAH patients had a higher median BMI  
178 compared to controls, and this was evident for both glucocorticoid-treated sub-cohort and the  
179 CAH sub-cohort never treated with glucocorticoids. CAH patients were more frequently  
180 overweight or obese (60.3% vs. 44.2% in matched controls,  $p < 0.001$ ), and this was observed  
181 both in glucocorticoid-treated and untreated CAH patients (59.1 and 61.1%, respectively). The  
182 Townsend Deprivation Index and the Charlson Comorbidity Index did not differ between CAH  
183 patients and controls.

184 ***Glucocorticoid prescriptions***

185 The most commonly prescribed type of glucocorticoid in the AD cohort was hydrocortisone  
186 (1296 patients, 82%), followed by prednisolone (187 patients, 11.8%). Only a minority of  
187 patients were prescribed cortisone acetate (91 patients, 5.8%, no longer available in the UK)  
188 and dexamethasone (6 patients, 0.4%).

189 In the glucocorticoid-treated CAH cohort, prednisolone was most commonly prescribed (127  
190 patients, 50.0%), followed by hydrocortisone (96 patients, 37.8%), with a small minority  
191 receiving dexamethasone (15 patients, 5.9%) or cortisone acetate (11 patients, 4.3%). Only five  
192 CAH patients (2%) were prescribed a combination of short- and long-acting glucocorticoids.

193 ***Risk of Infections***

194 The risk of LRTIs, UTIs and GIs was significantly increased in the AD cohort compared to  
195 unexposed patients, with the highest relative risk observed for GIs (adjusted incidence rate  
196 ratio (aIRR) 3.80 [95% CI 2.99-4.84]) followed by LRTIs (aIRR 2.11 [95% CI 1.64-2.69]) and  
197 UTIs (aIRR 1.51 [95% CI 1.29-1.77]) (Table 3 and Figure 1). These results were confirmed in  
198 the sub-analysis of patients who had at least two prescriptions of both glucocorticoids and  
199 mineralocorticoids (94.5% of the total cohort) (Suppl. Table 1).

200 In the overall CAH cohort, there was a significantly increased risk of UTIs and LRTIs (aIRR 1.40  
201 [95% CI 1.06-1.85] and 2.36 [95% CI 1.25-4.42], respectively), with no difference in GI  
202 infections (Table 4 and Figure 1). However, when analyzing the population accordingly to  
203 glucocorticoid use, only patients exposed to glucocorticoids had an increased risk of infections,  
204 with the highest risk observed for LRTIs (aIRR 3.23 [95% CI 1.21-8.61]) followed by UTIs (aIRR  
205 2.20 [95% CI 1.43-3.4]) and GIs (aIRR 1.93 [95% CI 1.06-3.52]) (Table 4 and Figure 1). In  
206 contrast, infection risk in CAH patients not treated with glucocorticoids did not differ from that  
207 observed in the matched background population.

208 ***Antimicrobial prescriptions***

209 Prescription rates of antibiotics and antifungals were increased in patients with AD (aIRR 1.73  
210 [95% CI 1.69-1.77] and 1.89 [95% CI 1.74-2.05], respectively) (Table 5 and Figure 1). These  
211 results were confirmed in the sub-analysis of patients who had at least two prescriptions of both  
212 glucocorticoids and mineralocorticoids (Suppl. Table 2).

213 Similarly, we observed increased antimicrobial prescription rates in CAH patients, with a higher  
214 prescription rate in glucocorticoid-treated patients (antibiotics: aIRR 1.77 [95% CI 1.66-1.89];  
215 antifungals: aIRR 1.91 [95% CI 1.50-2.43]) than in CAH patients not exposed to glucocorticoids  
216 (antibiotics: aIRR 1.15 [95% CI 1.08-1.23]; antifungals: aIRR 1.44 [95% CI 1.18-1.83]) (Table 6  
217 and Figure 1).

218 Given the higher incidence of type 1 diabetes mellitus (T1DM) in our AD cohort (8% vs. 0.5% in  
219 matched controls), and given the potentially higher risk of infections in T1DM patients, we  
220 performed a sub group analysis comparing AD patients with and without T1DM to matched  
221 unexposed cohort. Findings were similar, though given the smaller number of T1DM patients  
222 group, some did not reach statistical significance (Suppl. Tables 3 and 4).

## 223 **DISCUSSION**

224 In this population-based study we found that the risk of three common infections (lower  
225 respiratory tract, urinary tract, and gastrointestinal infections) was increased in the primary care  
226 setting in patients with PAI, as compared to population-based matched controls. This was also  
227 supported by our finding of increased prescription rates of antimicrobials in in patients with PAI.  
228 Moreover, we found that CAH patients not receiving glucocorticoids did not have an increased  
229 risk of infections, indicating that glucocorticoid therapy might at least partly drive the increased  
230 infection risk observed in PAI. To our knowledge, our study is the first to analyze the risk of  
231 infection in PAI according to different etiologies and also the first to evaluate these outcomes in  
232 a primary care setting.

233 Previous studies have described an increased infection-related mortality in patients with AD  
234 (2,4), but not in CAH patients (3). This was attributed to infections representing a possible  
235 trigger for a fatal adrenal crisis. Smans and colleagues reported an increase of the use of  
236 antimicrobials and of infection-related hospital admissions in PAI (5); however, the authors  
237 focused on hospital-treated infections only, possibly overestimating the actual incidence of this  
238 complication due to a lower threshold for admission in PAI patients. In addition, information on  
239 the actual etiology of PAI was not available in this study, as PAI was diagnosed based on  
240 concomitant glucocorticoid and mineralocorticoid prescriptions, which did not allow to  
241 differentiate between AD, CAH, and other causes of PAI.

242 Until recently, it was unclear whether the observed increase in infection episodes in patients  
243 with PAI is related to the underlying disease itself or to the non-physiological delivery of  
244 glucocorticoid replacement by currently available glucocorticoid preparations. Autoimmune AD  
245 patients frequently also suffer from other autoimmune comorbidities (18), and this was  
246 confirmed in our study, with more prevalent autoimmune disease in our AD cohort, which can be  
247 safely assumed to consist of a large majority of patients with AD of autoimmune origin.

248 However, in CAH patients, there is only marginal evidence of an imbalance of immune function  
249 (19), and as we found similar increases in infection risk in the CAH cohort, potential etiology-  
250 related immune function is unlikely to explain the increased susceptibility to infections we  
251 observed.

252 Supraphysiological glucocorticoid doses, as usually administered in the context of chronic  
253 inflammatory disease, is well known to cause changes in the immune system, with consequently  
254 increased risk of bacterial and fungal infections (20). However, this has not been demonstrated  
255 for the physiological replacement doses generally used in patients with PAI. Still, currently  
256 available glucocorticoid replacement therapy does not provide a physiological substitution, with  
257 significant peaks and troughs of cortisol availability during the day following oral intake of  
258 immediate release glucocorticoid preparations. In addition, significant heterogeneity exists in the  
259 management of glucocorticoid replacement in clinical practice; a recent paper recorded 25  
260 different regimens with which glucocorticoid therapy is administered in AD patients receiving a  
261 daily hydrocortisone of 20 mg (21). Therefore, it would come as no surprise that also  
262 physiological dose glucocorticoid therapy is not free of side effects, if administered in a non-  
263 physiological delivery pattern. An improvement in metabolic outcomes after switching from  
264 standard cortisol replacement to more physiological cortisol replacement via continuous  
265 subcutaneous hydrocortisone was previously demonstrated in both AD and CAH patients  
266 (22,23).

267 Some recent papers have indeed suggested that adverse changes in immune function might  
268 occur with glucocorticoid replacement in PAI. A recent paper documented significantly  
269 decreased natural killer cytotoxicity in patients with PAI (7), which was present in both patients  
270 with autoimmune adrenalitis and those with PAI following bilateral adrenalectomy, indicating that  
271 the underlying etiology did not play a role in these changes in immune function. A recent  
272 randomized control trial including patients with primary and secondary adrenal insufficiency  
273 reported a reduction in respiratory tract infections with modified-release hydrocortisone (8).

274 However, this was a secondary outcome, based on self-reported questionnaires on infections  
275 and not verified against medical records, thereby providing only limited evidence. A study on  
276 immune function in the same cohort reported dysregulation of circadian gene expression in  
277 peripheral blood mononuclear cells in the PAI patients at baseline, which attenuated after the  
278 switch to modified-release hydrocortisone therapy (24). The findings of our study, including both  
279 patients with AD and CAH, suggest that exogenous glucocorticoid is at least a contributory  
280 factor to the increased infection risk we observed, given that no significant increase in infection  
281 risk was observed in the CAH patients not receiving glucocorticoid therapy.

282 Both our AD and CAH populations had increased prescription rates for antibiotics and  
283 antifungals. Interestingly, increased prescription rates were also noted in the CAH patients not  
284 receiving glucocorticoid treatment, albeit to a much lower extent. This could possibly be  
285 explained by a lower threshold for prescribing antimicrobials due to the perceived risk of adrenal  
286 crisis in CAH patients; in fact, up to 60% of non-classic CAH patients, who usually do not  
287 receive chronic glucocorticoid replacement, have been reported to have at least partial  
288 glucocorticoid deficiency as assessed by cosyntropin testing (25).

289 The highest increase in risk of infection in our AD cohort was seen in GIIs, while for the CAH  
290 cohort on glucocorticoids the most significant increase in risk was seen in LRTIs and UTIs;  
291 however, the differences between the three infection groups was not statistically significant. This  
292 may be explained by the age difference between AD and CAH patients, with mean ages of 51.7  
293 and 35.4 years, respectively. Indeed, LRTIs and UTIs are more frequently diagnosed in older  
294 patients (26,27), and this was noted in our matched populations as well (population matched for  
295 AD: LRTIs 4.3%, UTIs 12.5%; population matched for CAH patients on glucocorticoids: LRTIs  
296 1.4%, UTIs 8.5%). Therefore, the higher aIRR of LRTIs and UTIs in CAH patients is probably  
297 related to a difference in age-related background risk.

298 Our AD cohort had an age and sex distribution similar to the one reported in other papers (2,5),  
299 and the types of prescribed glucocorticoid preparations at baseline in this cohort were not

300 different from the ones reported in a recent worldwide survey (28). Our CAH cohort was  
301 younger than the AD cohort, consistent with the different etiology of these two diseases, and the  
302 types of glucocorticoids prescribed was similar to those reported in the cross-sectional UK  
303 CaHASE study (29), with the possible exception of lower numbers of dexamethasone users in  
304 our study. Taking this into account, our results can be assumed to be representative of the UK  
305 AD and CAH populations.

306 Our study has several strengths. We used a large population-based sample of patients of both  
307 sexes, across all adult age groups, with very strict inclusion and exclusion criteria, allowing us to  
308 include only patients with a true diagnosis of AD and CAH. Using the cohort study design,  
309 allowed us to look at longitudinal occurrence of infections and antimicrobial use. There are also  
310 some limitations to our study. Firstly, all data relies on the accurate recording of diagnoses by  
311 GPs and this could have resulted in some degree of misclassification of the exposed cohorts  
312 and of the different episodes of infection. Though general practitioners document reasons for  
313 consultations in the electronic medical records, it is possible that when a patient presented with  
314 two or more conditions this may have not been accurately coded; however all prescriptions are  
315 electronically documented and therefore are captured accurately. Secondly, the threshold for  
316 visiting GP might be lower in patients with PAI who receive regular education on the importance  
317 of treating infections promptly to avoid adrenal crisis. This may be a factor resulting in a degree  
318 of overestimation of the difference in the infection rates we found between these cohorts.  
319 However, since patients with PAI are generally more medicalized, it is also possible that they  
320 own a higher knowledge of diseases and might decide to treat themselves without consulting  
321 the GP. Thirdly, we could not evaluate the influence of different doses or types of glucocorticoid  
322 on the outcomes of interest due to the methodology used and due to the small number of  
323 infection events when further subdividing our populations according to type of glucocorticoid.  
324 Furthermore, even though we tried to assess the impact of associated comorbidities by  
325 adjusting for Charlson Comorbidity Index, this does not exclude the possibility that some other

326 confounders not accounted for in our analyses might have influenced our results. Lastly, though  
327 there is some evidence of an immune-modulatory effect of androgens (30), we could not take  
328 this into account in our population as we had no data on DHEA replacement therapy in AD  
329 patients, since this is a hospital-prescribed drug in the UK; similarly, we did not have data on  
330 biochemical control of androgen excess in the CAH patients.

331 Our findings have several practical implications. Firstly, given the confirmation of a higher risk of  
332 infections in patients with PAI due to AD and CAH, all healthcare professionals involved in the  
333 care of PAI patients should have a heightened alertness for the possibility of infections in these  
334 patients. This may also provide a case for recommending a vaccination strategy in PAI, e.g.  
335 against *Streptococcus pneumoniae*, the leading cause of LRTIs in adults (31), in order to reduce  
336 the risk of these infections and related morbidity and mortality. Secondly, our paper provides  
337 additional evidence that non-physiological delivery of glucocorticoid replacement by currently  
338 available preparations represents a risk factor for the development of infections. This supports  
339 the case for a therapeutic shift towards more physiological replacement therapy options in these  
340 patients (32). Future studies will have to clarify whether achieving a more physiological delivery  
341 of glucocorticoid replacement will decrease the risk of infections in PAI, with the potential to  
342 result in reduced morbidity and mortality in these patients.

### 343 **ACKNOWLEDGMENTS**

344 This work was supported by the Medical Research Council UK (Program Grant 0900567, to  
345 W.A.). K.N. is a UK Research and Innovation (UKRI)/Health Data Research (HDR) UK  
346 Innovation Clinical Fellow. W.A. receives support from the National Institute of Health Research  
347 (NIHR) Birmingham Biomedical Research Centre (BRC-1215-20009). The views expressed in  
348 this publication are those of the authors and not necessarily those of the NIHR or the  
349 Department of Health and Social Care UK.



350 **REFERENCES**

- 351 1. Bancos I, Hahner S, Tomlinson J, Arlt W. Diagnosis and management of adrenal  
352 insufficiency. *The lancet Diabetes & endocrinology*. 2015;3(3):216-226.
- 353 2. Erichsen MM, Lovas K, Fougner KJ, Svartberg J, Hauge ER, Bollerslev J, Berg  
354 JP, Mella B, Husebye ES. Normal overall mortality rate in Addison's disease, but  
355 young patients are at risk of premature death. *European journal of endocrinology*.  
356 2009;160(2):233-237.
- 357 3. Falhammar H, Frisén L, Norrby C, Hirschberg AL, Almqvist C, Nordenskjöld A,  
358 Nordenström A. Increased Mortality in Patients With Congenital Adrenal  
359 Hyperplasia Due to 21-Hydroxylase Deficiency. *The Journal of Clinical*  
360 *Endocrinology & Metabolism*. 2014;99(12):E2715-E2721.
- 361 4. Bergthorsdottir R, Leonsson-Zachrisson M, Oden A, Johannsson G. Premature  
362 mortality in patients with Addison's disease: a population-based study. *The*  
363 *Journal of clinical endocrinology and metabolism*. 2006;91(12):4849-4853.
- 364 5. Smans LC, Souverein PC, Leufkens HG, Hoepelman AI, Zelissen PM. Increased  
365 use of antimicrobial agents and hospital admission for infections in patients with  
366 primary adrenal insufficiency: a cohort study. *European journal of endocrinology*.  
367 2013;168(4):609-614.
- 368 6. Bjornsdottir S, Sundstrom A, Ludvigsson JF, Blomqvist P, Kampe O, Bensing S.  
369 Drug prescription patterns in patients with Addison's disease: a Swedish  
370 population-based cohort study. *The Journal of clinical endocrinology and*  
371 *metabolism*. 2013;98(5):2009-2018.
- 372 7. Bancos I, Hazeldine J, Chortis V, Hampson P, Taylor AE, Lord JM, Arlt W.  
373 Primary adrenal insufficiency is associated with impaired natural killer cell  
374 function: a potential link to increased mortality. *European journal of*  
375 *endocrinology*. 2017;176(4):471-480.
- 376 8. Isidori AM, Venneri MA, Graziadio C, Simeoli C, Fiore D, Hasenmajer V,  
377 Sbardella E, Gianfrilli D, Pozza C, Pasqualetti P, Morrone S, Santoni A, Naro F,  
378 Colao A, Pivonello R, Lenzi A. Effect of once-daily, modified-release  
379 hydrocortisone versus standard glucocorticoid therapy on metabolism and innate

- 380 immunity in patients with adrenal insufficiency (DREAM): a single-blind,  
381 randomised controlled trial. *The lancet Diabetes & endocrinology*. 2018;6(3):173-  
382 185.
- 383 9. Lewis JD, Schinnar R, Bilker WB, Wang X, Strom BL. Validation studies of the  
384 health improvement network (THIN) database for pharmacoepidemiology  
385 research. *Pharmacoepidemiology and drug safety*. 2007;16(4):393-401.
- 386 10. Blak BT, Thompson M, Dattani H, Bourke A. Generalisability of The Health  
387 Improvement Network (THIN) database: demographics, chronic disease  
388 prevalence and mortality rates. *Informatics in primary care*. 2011;19(4):251-255.
- 389 11. Iqbal K, Halsby K, Murray RD, Carroll PV, Petermann R. Glucocorticoid  
390 management of adrenal insufficiency in the United Kingdom: assessment using  
391 real-world data. *Endocrine connections*. 2018;8(1):20-31.
- 392 12. Jenkins-Jones S, Parviainen L, Porter J, Withe M, Whitaker MJ, Holden SE,  
393 Morgan CL, Currie CJ, Ross RJM. Poor compliance and increased mortality,  
394 depression and healthcare costs in patients with congenital adrenal hyperplasia.  
395 *European journal of endocrinology*. 2018;178(4):309-320.
- 396 13. Maguire A, Blak BT, Thompson M. The importance of defining periods of  
397 complete mortality reporting for research using automated data from primary  
398 care. *Pharmacoepidemiology and drug safety*. 2009;18(1):76-83.
- 399 14. Fleming DM, Cross KW, Barley MA. Recent changes in the prevalence of  
400 diseases presenting for health care. *The British journal of general practice : the*  
401 *journal of the Royal College of General Practitioners*. 2005;55(517):589-595.
- 402 15. UK Data Service Census from [https://census.ukdataservice.ac.uk/get-](https://census.ukdataservice.ac.uk/get-data/related/deprivation)  
403 [data/related/deprivation](https://census.ukdataservice.ac.uk/get-data/related/deprivation).
- 404 16. Charlson ME, Pompei P, Ales KL, MacKenzie CR. A new method of classifying  
405 prognostic comorbidity in longitudinal studies: development and validation.  
406 *Journal of chronic diseases*. 1987;40(5):373-383.
- 407 17. Crooks CJ, West J, Card TR. A comparison of the recording of comorbidity in  
408 primary and secondary care by using the Charlson Index to predict short-term  
409 and long-term survival in a routine linked data cohort. *BMJ open*.  
410 2015;5(6):e007974.

- 411 18. Betterle C, Dal Pra C, Mantero F, Zanchetta R. Autoimmune adrenal insufficiency  
412 and autoimmune polyendocrine syndromes: autoantibodies, autoantigens, and  
413 their applicability in diagnosis and disease prediction. *Endocrine reviews*.  
414 2002;23(3):327-364.
- 415 19. Parlato F, Pisano G, Brillante M, Ferrone R, Cavalcanti MR, Cosentini E, Misiano  
416 G, Brai M, Bellastella A. Immunological pattern in patients with 21-hydroxylase  
417 deficiency. *Journal of endocrinological investigation*. 1994;17(8):635-639.
- 418 20. Fardet L, Petersen I, Nazareth I. Common Infections in Patients Prescribed  
419 Systemic Glucocorticoids in Primary Care: A Population-Based Cohort Study.  
420 *PLoS medicine*. 2016;13(5):e1002024.
- 421 21. Murray RD, Ekman B, Uddin S, Marelli C, Quinkler M, Zelissen PM, the EUAIRI.  
422 Management of glucocorticoid replacement in adrenal insufficiency shows  
423 notable heterogeneity - data from the EU-AIR. *Clinical endocrinology*.  
424 2017;86(3):340-346.
- 425 22. Gagliardi L, Nenke MA, Thynne TR, von der Borch J, Rankin WA, Henley DE,  
426 Sorbello J, Inder WJ, Torpy DJ. Continuous subcutaneous hydrocortisone  
427 infusion therapy in Addison's disease: a randomized, placebo-controlled clinical  
428 trial. *The Journal of clinical endocrinology and metabolism*. 2014;99(11):4149-  
429 4157.
- 430 23. Mallappa A, Nella AA, Sinaii N, Rao H, Gounden V, Perritt AF, Kumar P, Ling A,  
431 Liu CY, Soldin SJ, Merke DP. Long-term use of continuous subcutaneous  
432 hydrocortisone infusion therapy in patients with congenital adrenal hyperplasia.  
433 *Clinical endocrinology*. 2018.
- 434 24. Muller L, Quinkler M. Adrenal disease: Imitating the cortisol profile improves the  
435 immune system. *Nature reviews Endocrinology*. 2018;14(3):137-139.
- 436 25. Stoupa A, Gonzalez-Briceno L, Pinto G, Samara-Boustani D, Thalassinos C,  
437 Flechtner I, Beltrand J, Bidet M, Simon A, Piketty M, Laborde K, Morel Y,  
438 Bellanne-Chantelot C, Touraine P, Polak M. Inadequate cortisol response to the  
439 tetracosactide (Synacthen(R)) test in non-classic congenital adrenal hyperplasia:  
440 an exception to the rule? *Hormone research in paediatrics*. 2015;83(4):262-267.

- 441 26. Ahmed H, Farewell D, Jones HM, Francis NA, Paranjothy S, Butler CC.  
442 Incidence and antibiotic prescribing for clinically diagnosed urinary tract infection  
443 in older adults in UK primary care, 2004-2014. *PloS one*. 2018;13(1):e0190521.
- 444 27. Hak E, Rovers MM, Kuyvenhoven MM, Schellevis FG, Verheij TJ. Incidence of  
445 GP-diagnosed respiratory tract infections according to age, gender and high-risk  
446 co-morbidity: the Second Dutch National Survey of General Practice. *Family  
447 practice*. 2006;23(3):291-294.
- 448 28. Forss M, Batcheller G, Skrtic S, Johannsson G. Current practice of glucocorticoid  
449 replacement therapy and patient-perceived health outcomes in adrenal  
450 insufficiency - a worldwide patient survey. *BMC endocrine disorders*. 2012;12:8.
- 451 29. Arlt W, Willis DS, Wild SH, Krone N, Doherty EJ, Hahner S, Han TS, Carroll PV,  
452 Conway GS, Rees DA, Stimson RH, Walker BR, Connell JM, Ross RJ. Health  
453 status of adults with congenital adrenal hyperplasia: a cohort study of 203  
454 patients. *The Journal of clinical endocrinology and metabolism*.  
455 2010;95(11):5110-5121.
- 456 30. Trigunaite A, Dimo J, Jorgensen TN. Suppressive effects of androgens on the  
457 immune system. *Cellular immunology*. 2015;294(2):87-94.
- 458 31. Use of 13-valent pneumococcal conjugate vaccine and 23-valent pneumococcal  
459 polysaccharide vaccine for adults with immunocompromising conditions:  
460 recommendations of the Advisory Committee on Immunization Practices (ACIP).  
461 *MMWR Morbidity and mortality weekly report*. 2012;61(40):816-819.
- 462 32. Whitaker M, Debono M, Huatan H, Merke D, Arlt W, Ross RJ. An oral  
463 multiparticulate, modified-release, hydrocortisone replacement therapy that  
464 provides physiological cortisol exposure. *Clinical endocrinology*. 2014;80(4):554-  
465 561.

466

467 **Figure Legends**

468 **Figure 1 - Forest plot of outcomes.** Panel A: adjusted Incidence Rate Ratio (aIRR) for  
 469 infections and antimicrobial prescriptions in AD and CAH cohorts. Panel B: aIRR for infections  
 470 and antimicrobial prescriptions in CAH patients separately for patients with and without chronic  
 471 glucocorticoid treatment.

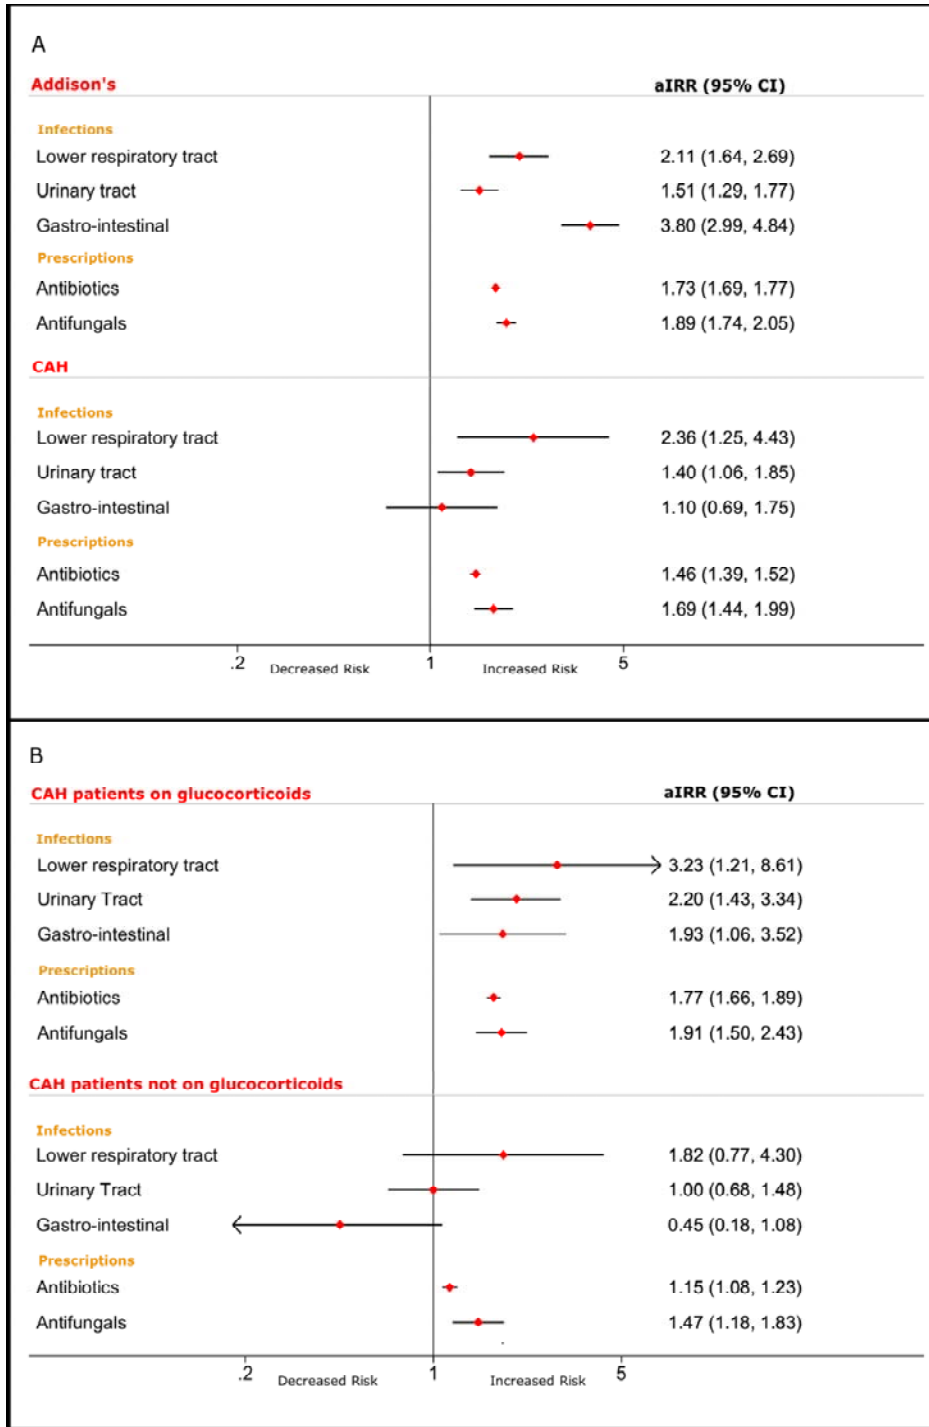

472

473 **Table 1:** Baseline characteristics of patients with Addison's disease (AD) and matched  
474 unexposed patients.

|                                            | <b>AD patients<br/>(n = 1580)</b> | <b>Matched unexposed<br/>patients (n = 3158)</b> |
|--------------------------------------------|-----------------------------------|--------------------------------------------------|
| <b>Age</b> years, mean $\pm$ SD            | 51.7 $\pm$ 18.5                   | 51.7 $\pm$ 18.5                                  |
| <b>Male sex</b> , n. (%)                   | 666 (42.2%)                       | 1.330 (42.1%)                                    |
| <b>BMI</b>                                 | <u>Total n = 1227</u>             | <u>Total n = 2264</u>                            |
| median (IQR)                               | 24.3 (21.5-27.6)*                 | 25.5 (22.6-28.9)                                 |
| □ 18.5 kg/m <sup>2</sup> , n. (%)          | 87 (7.1%)                         | 51 (2.3%)                                        |
| 18.5-25 kg/m <sup>2</sup> , n. (%)         | 606 (49.4%)                       | 973 (43.0%)                                      |
| 25-30 kg/m <sup>2</sup> , n. (%)           | 362 (29.5%)                       | 791 (34.9%)                                      |
| $\geq$ 30 kg/m <sup>2</sup> , n. (%)       | 172 (14.0%)                       | 449 (19.8%)                                      |
| Missing, n.                                | 353                               | 894                                              |
| <b>Smoking status</b>                      | <u>Total = 1384</u>               | <u>Total = 2679</u>                              |
| Non-smoker, n. (%)                         | 882 (63.7%)*                      | 1548 (57.8%)                                     |
| Ex-smoker, n. (%)                          | 250 (18.1%)                       | 490 (18.3%)                                      |
| Smoker, n. (%)                             | 252 (18.2%)*                      | 641 (23.9%)                                      |
| Missing, n.                                | 196                               | 479                                              |
| <b>Townsend Deprivation Index</b>          | <u>Total = 1373</u>               | <u>Total = 2780</u>                              |
| 1 (least deprived), n. (%)                 | 350 (25.5%)                       | 743 (26.7%)                                      |
| 2, n. (%)                                  | 306 (22.3%)                       | 590 (21.2%)                                      |
| 3, n. (%)                                  | 290 (21.1%)                       | 607 (21.8%)                                      |
| 4, n. (%)                                  | 255 (18.6%)                       | 471 (16.9%)                                      |
| 5 (most deprived), n. (%)                  | 172 (12.5%)                       | 369 (13.3%)                                      |
| Missing, n.                                | 207                               | 378                                              |
| <b>Charlson Comorbidity Index</b>          |                                   |                                                  |
| 0 (no comorbidities), n. (%)               | 863 (54.6%)*                      | 2263 (71.7%)                                     |
| 1, n. (%)                                  | 377 (23.9%)*                      | 536 (17.0%)                                      |
| $\geq$ 2 (more comorbidities), n. (%)      | 340 (21.5%)*                      | 359 (11.4%)                                      |
| <b>Associated autoimmune comorbidities</b> |                                   |                                                  |
| Hyperthyroidism, n. (%)                    | 40 (2.5%)*                        | 16 (0.5%)                                        |
| Hypothyroidism, n. (%)                     | 457 (28.9%)*                      | 122 (3.9%)                                       |
| Rheumatoid arthritis, n. (%)               | 25 (1.6%)                         | 37 (1.2%)                                        |
| Type 1 diabetes mellitus, n. (%)           | 127 (8.0%)*                       | 15 (0.5%)                                        |
| Inflammatory bowel disease, n. (%)         | 29 (1.8%)*                        | 22 (0.7%)                                        |
| Crohn's disease, n. (%)                    | 9 (0.6%)                          | 9 (0.3%)                                         |
| Ulcerative colitis, n. (%)                 | 20 (1.3%)*                        | 11 (0.4%)                                        |
| Coeliac disease, n. (%)                    | 25 (1.6%)*                        | 10 (0.3%)                                        |
| Multiple sclerosis, n. (%)                 | n < 5                             | 8 (0.3%)                                         |
| Pernicious anaemia, n. (%)                 | 41 (2.6%)*                        | 15 (0.5%)                                        |
| Systemic lupus erythematosus, n. (%)       | 6 (0.4%)                          | n < 5                                            |

475 \*p <0.05 for AD patients vs. unexposed cohort.

476

477 **Table 2:** Baseline characteristics of the CAH patients and matched unexposed patients.

|                                   | CAH cohort<br>(n = 602) | Matched<br>unexposed cohort<br>(n = 1204) | CAH cohort on<br>glucocorticoids<br>(n = 254) | Matched<br>unexposed<br>cohort (n = 508) | CAH cohort not on<br>glucocorticoids<br>(n = 348) | Matched<br>unexposed<br>cohort (n = 695) |
|-----------------------------------|-------------------------|-------------------------------------------|-----------------------------------------------|------------------------------------------|---------------------------------------------------|------------------------------------------|
| <b>Age, years, mean ± SD</b>      | 35.4 ± 16.3             | 35.5 ± 16.2                               | 33.4 ± 15.1                                   | 33.5 ± 15.0                              | 36.9 ± 17.0 <sup>†</sup>                          | 37.0 ± 16.9                              |
| <b>Male sex, n. (%)</b>           | 167 (27.7%)             | 334 (27.7%)                               | 80 (31.5%)                                    | 160 (31.5%)                              | 87 (25.0%)                                        | 174 (25.0%)                              |
| <b>BMI</b>                        | <u>Total = 438</u>      | <u>Total = 835</u>                        | <u>Total = 186</u>                            | <u>Total = 340</u>                       | <u>Total = 252</u>                                | <u>Total = 495</u>                       |
| median (IQR)                      | 26.9 (23.2-31.2)*       | 24.0 (21.0-28.0)                          | 27.0 (23.2-32.0)*                             | 24.0 (21.3-27.9)                         | 26.9 (23.2-30.9)*                                 | 24.4 (21.8-28.0)                         |
| □18.5, n. (%)                     | 12 (2.7%)               | 35 (4.2%)                                 | 8 (4.3%)                                      | 9 (2.6%)                                 | 4 (1.6%)                                          | 26 (5.2%)                                |
| 18.5-25, n. (%)                   | 162 (37.0%)             | 431 (51.6%)                               | 68 (36.6%)                                    | 187 (55.0%)                              | 94 (37.3%)                                        | 244 (49.3%)                              |
| 25-30, n. (%)                     | 133 (30.4%)             | 224 (26.8%)                               | 52 (28.0%)                                    | 90 (26.5%)                               | 81 (32.1%)                                        | 134 (27.1%)                              |
| ≥30, n. (%)                       | 131 (29.9%)             | 145 (17.4%)                               | 58 (31.2%)                                    | 54 (15.9%)                               | 73 (29.0%)                                        | 91 (18.4%)                               |
| Missing, n.                       | 164                     | 369                                       | 68                                            | 168                                      | 96                                                | 201                                      |
| <b>Smoking status</b>             | <u>Total = 524</u>      | <u>Total = 1048</u>                       | <u>Total = 212</u>                            | <u>Total = 423</u>                       | <u>Total = 312</u>                                | <u>Total = 625</u>                       |
| Non-smoker, n. (%)                | 349 (66.6%)             | 670 (63.9%)                               | 138 (65.1%)                                   | 277 (65.5%)                              | 211 (67.6%)                                       | 393 (62.9%)                              |
| Ex-smoker, n. (%)                 | 71 (13.6%)              | 142 (13.6%)                               | 28 (13.2%)                                    | 50 (11.8%)                               | 43 (13.8%)                                        | 92 (14.7%)                               |
| Smoker, n. (%)                    | 104 (19.9%)             | 236 (22.5%)                               | 46 (21.7%)                                    | 96 (22.7%)                               | 58 (18.6%)                                        | 140 (22.4%)                              |
| Missing, n.                       | 78                      | 156                                       | 42                                            | 85                                       | 36                                                | 71                                       |
| <b>Townsend Deprivation Index</b> | <u>Total = 516</u>      | <u>Total = 1057</u>                       | <u>Total = 223</u>                            | <u>Total = 459</u>                       | <u>Total = 293</u>                                | <u>Total = 598</u>                       |
| 1 (least deprived), n. (%)        | 123 (23.8%)             | 235 (22.2%)                               | 52 (23.3%)                                    | 107 (23.3%)                              | 71 (24.2%)                                        | 128 (21.4%)                              |
| 2, n. (%)                         | 107 (20.7%)             | 222 (21.0%)                               | 46 (20.6%)                                    | 92 (20.0%)                               | 61 (20.8%)                                        | 130 (21.7%)                              |
| 3, n. (%)                         | 114 (22.1%)             | 232 (22.0%)                               | 51 (22.9%)                                    | 99 (21.6%)                               | 63 (21.5%)                                        | 133 (22.2%)                              |
| 4, n. (%)                         | 104 (20.2%)             | 225 (21.3%)                               | 44 (19.7%)                                    | 98 (21.4%)                               | 60 (20.5%)                                        | 127 (21.2%)                              |
| 5 (most deprived), n. (%)         | 68 (13.2%)              | 143 (13.5%)                               | 30 (13.5%)                                    | 63 (13.7%)                               | 38 (13.0%)                                        | 80 (13.4%)                               |
| Missing, n.                       | 86                      | 147                                       | 31                                            | 49                                       | 55                                                | 98                                       |
| <b>Charlson Comorbidity Index</b> |                         |                                           |                                               |                                          |                                                   |                                          |
| 0 (no comorbidities), n. (%)      | 457 (75.9%)             | 907 (75.3%)                               | 187 (73.6%)                                   | 394 (77.6%)                              | 270 (77.6%)                                       | 513 (73.7%)                              |
| 1, n. (%)                         | 103 (17.1%)             | 242 (20.1%)                               | 50 (19.7%)                                    | 96 (18.9%)                               | 53 (15.2%)                                        | 146 (21.0%)                              |
| ≥2 (more comorbidities), n. (%)   | 42 (7.0%)               | 55 (4.6%)                                 | 17 (6.7%)                                     | 18 (3.5%)                                | 25 (7.2%)                                         | 37 (5.3%)                                |

478 \*p <0.05 for CAH patients vs. unexposed cohort.

479 †p <0.05 for CAH patients on glucocorticoids vs. CAH patients not on glucocorticoids.

480

481 **Table 3:** Absolute and relative risk of infections in AD patients and matched cohort.

|                                                     | <b>AD cohort (n = 1580)</b> | <b>Matched unexposed cohort (n = 3158)</b> |
|-----------------------------------------------------|-----------------------------|--------------------------------------------|
| <b>Lower respiratory tract infections</b>           |                             |                                            |
| Outcome events, n. (%)                              | 130 (8.2)                   | 137 (4.3)                                  |
| Person-years                                        | 10,337                      | 22,836                                     |
| Crude incidence rate/1000-person years              | 12.58                       | 6.00                                       |
| Follow-up years, median (IQR)                       | 4.87 (1.78-10.20)           | 5.78 (2.37-11.12)                          |
| Unadjusted incidence rate ratio (95% CI)            | 2.10 (1.65-2.66)            |                                            |
| p-value                                             | p <0.001                    |                                            |
| Adjusted incidence rate ratio (95% CI) <sup>†</sup> | 2.11 (1.64-2.69)            |                                            |
| p-value                                             | p <0.001                    |                                            |
| <b>Urinary tract infections</b>                     |                             |                                            |
| Outcome events, n. (%)                              | 282 (17.9)                  | 396 (12.5)                                 |
| Person-years                                        | 9,248                       | 21,003                                     |
| Crude incidence rate/1000-person years              | 30.49                       | 18.85                                      |
| Follow-up years, median (IQR)                       | 4.09 (1.44-9.14)            | 5.08 (2.11-10.26)                          |
| Unadjusted incidence rate ratio (95% CI)            | 1.62 (1.39-1.88)            |                                            |
| p-value                                             | p <0.001                    |                                            |
| Adjusted incidence rate ratio (95% CI) <sup>†</sup> | 1.51 (1.29-1.77)            |                                            |
| p-value                                             | p <0.001                    |                                            |
| <b>Gastro-intestinal infections</b>                 |                             |                                            |
| Outcome events, n. (%)                              | 194 (12.3)                  | 110 (3.5)                                  |
| Person-years                                        | 9,598                       | 22,662                                     |
| Crude incidence rate/1000-person years              | 20.21                       | 4.85                                       |
| Follow-up years, median (IQR)                       | 4.49 (1.67-9.31)            | 5.63 (2.37-11.03)                          |
| Unadjusted incidence rate ratio (95% CI)            | 4.16 (3.30-5.26)            |                                            |
| p-value                                             | p <0.001                    |                                            |
| Adjusted incidence rate ratio (95% CI) <sup>†</sup> | 3.80 (2.99-4.84)            |                                            |
| p-value                                             | p <0.001                    |                                            |

482 <sup>†</sup>Adjusted for age, gender, smoking status, BMI, Townsend Deprivation Index and Charlson Comorbidity  
 483 Index.



484 **Table 4:** Absolute and relative risk of infections in CAH patients and matched control cohort.

|                                                     | CAH cohort<br>(n = 602) | Matched<br>unexposed<br>cohort (n = 1204) | CAH cohort on<br>glucocorticoids<br>(n = 254) | Matched<br>unexposed<br>cohort (n = 508) | CAH cohort not on<br>glucocorticoids<br>(n = 348) | Matched<br>unexposed<br>cohort (n = 696) |
|-----------------------------------------------------|-------------------------|-------------------------------------------|-----------------------------------------------|------------------------------------------|---------------------------------------------------|------------------------------------------|
| <b>Lower respiratory tract infections</b>           |                         |                                           |                                               |                                          |                                                   |                                          |
| Outcome events, n. (%)                              | 22 (3.7)                | 19 (1.6)                                  | 12 (4.7)                                      | 7 (1.4)                                  | 10 (2.9)                                          | 12 (1.7)                                 |
| Person-years                                        | 3843                    | 7842                                      | 1924                                          | 3567                                     | 1919                                              | 4275                                     |
| Crude incidence rate/1000-person years              | 5.72                    | 2.42                                      | 6.24                                          | 1.96                                     | 5.21                                              | 2.81                                     |
| Follow-up years, median (IQR)                       | 4.83 (1.92-9.54)        | 5.10 (2.04-9.80)                          | 6.00 (2.60-12.06)                             | 5.17 (2.45-10.77)                        | 4.07 (1.54-8.00)                                  | 4.93 (1.86-9.37)                         |
| Unadjusted incidence rate ratio (95% CI)            | 2.36 (1.28-4.36)        |                                           | 3.18 (1.25-8.07)                              |                                          | 1.86 (0.80-4.30)                                  |                                          |
| p-value                                             | p = 0.01                |                                           | p = 0.02                                      |                                          | p = 0.15                                          |                                          |
| Adjusted incidence rate ratio (95% CI) <sup>†</sup> | 2.36 (1.25-4.43)        |                                           | 3.23 (1.21-8.61)                              |                                          | 1.82 (0.77-4.30)                                  |                                          |
| p-value                                             | p = 0.01                |                                           | p = 0.02                                      |                                          | p = 0.17                                          |                                          |
| <b>Urinary tract infections</b>                     |                         |                                           |                                               |                                          |                                                   |                                          |
| Outcome events, n. (%)                              | 83 (13.8)               | 130 (10.8)                                | 45 (17.7)                                     | 43 (8.5)                                 | 38 (10.9)                                         | 87 (12.5)                                |
| Person-years                                        | 3478                    | 7217                                      | 1709                                          | 3374                                     | 1769                                              | 3843                                     |
| Crude incidence rate/1000-person years              | 23.87                   | 18.01                                     | 26.33                                         | 12.75                                    | 21.48                                             | 22.64                                    |
| Follow-up years, median (IQR)                       | 4.15 (1.59-8.80)        | 4.64 (1.83-8.80)                          | 4.97 (2.09-9.77)                              | 4.84 (2.22-9.77)                         | 3.42 (1.24-7.53)                                  | 4.18 (1.69-7.90)                         |
| Unadjusted incidence rate ratio (95% CI)            | 1.32 (1.01-1.74)        |                                           | 2.07 (1.36-3.14)                              |                                          | 0.95 (0.65-1.39)                                  |                                          |
| p-value                                             | p = 0.05                |                                           | p <0.001                                      |                                          | p = 0.79                                          |                                          |
| Adjusted incidence rate ratio (95% CI) <sup>†</sup> | 1.40 (1.06-1.85)        |                                           | 2.20 (1.43-3.34)                              |                                          | 1.00 (0.68-1.48)                                  |                                          |
| p-value                                             | p = 0.02                |                                           | p <0.001                                      |                                          | p = 0.99                                          |                                          |
| <b>Gastro-intestinal infections</b>                 |                         |                                           |                                               |                                          |                                                   |                                          |
| Outcome events, n. (%)                              | 29 (4.8)                | 52 (4.3)                                  | 23 (9.1)                                      | 23 (4.5)                                 | 6 (1.7)                                           | 29 (4.2)                                 |
| Person-years.                                       | 3773                    | 7678                                      | 1825                                          | 3486                                     | 1948                                              | 4192                                     |
| Crude incidence rate/1000-person years              | 7.69                    | 6.77                                      | 12.60                                         | 6.60                                     | 3.08                                              | 6.92                                     |
| Follow-up years, median (IQR)                       | 4.70 (1.83-9.63)        | 4.94 (2.04-9.69)                          | 5.82 (2.12-11.38)                             | 5.14 (2.47-10.38)                        | 4.09 (1.50-8.11)                                  | 4.79 (1.86-9.13)                         |
| Unadjusted incidence rate ratio (95% CI)            | 1.13 (0.72-1.79)        |                                           | 1.91 (1.07-3.40)                              |                                          | 0.45 (0.18-1.07)                                  |                                          |
| p-value                                             | p = 0.59                |                                           | p = 0.03                                      |                                          | p = 0.07                                          |                                          |
| Adjusted incidence rate ratio (95% CI) <sup>†</sup> | 1.10 (0.69-1.75)        |                                           | 1.93 (1.06-3.52)                              |                                          | 0.45 (0.18-1.08)                                  |                                          |
| p-value                                             | p = 0.70                |                                           | p = 0.03                                      |                                          | p = 0.07                                          |                                          |

485 <sup>†</sup>Adjusted for age, gender, smoking status, BMI, Townsend Deprivation Index and Charlson Comorbidity Index.



486 **Table 5:** Antimicrobial prescriptions counts in AD patients compared to the matched control  
487 cohort.

|                                                     | <b>AD cohort (n = 1580)</b> | <b>Matched unexposed cohort (n = 3158)</b> |
|-----------------------------------------------------|-----------------------------|--------------------------------------------|
| <b>Antibiotic prescriptions</b>                     |                             |                                            |
| Count of prescriptions, n.                          | 13286                       | 15884                                      |
| Person-years                                        | 10767                       | 23308                                      |
| Count rates (per 1000 years)                        | 1234                        | 681                                        |
| Follow-up years, median (IQR)                       | 5.12 (1.95-10.77)           | 5.90 (2.54-11.33)                          |
| Unadjusted incidence rate ratio (95% CI)            | 1.81 (1.77-1.85)            |                                            |
| p-value                                             | p <0.001                    |                                            |
| Adjusted incidence rate ratio (95% CI) <sup>†</sup> | 1.73 (1.69-1.77)            |                                            |
| p-value                                             | p <0.001                    |                                            |
| <b>Antifungal prescriptions</b>                     |                             |                                            |
| Count of prescriptions, n.                          | 1191                        | 1213                                       |
| Person-years                                        | 10767                       | 23308                                      |
| Count rates (per 1000 years)                        | 111                         | 52                                         |
| Follow-up years, median (IQR)                       | 5.12 (1.95-10.77)           | 5.90 (2.54-11.33)                          |
| Unadjusted incidence rate ratio (95% CI)            | 2.13 (1.96-2.30)            |                                            |
| p-value                                             | p <0.001                    |                                            |
| Adjusted incidence rate ratio (95% CI) <sup>†</sup> | 1.89 (1.74-2.05)            |                                            |
| p-value                                             | p <0.001                    |                                            |

488 <sup>†</sup>Adjusted for age, gender, smoking status, BMI, Townsend Deprivation Index and Charlson Comorbidity  
489 Index.

490 **Table 6:** Antimicrobial prescription counts in CAH patients compared to the matched control cohort.

|                                                     | CAH cohort<br>(n = 602) | Matched<br>unexposed<br>cohort (n = 1204) | CAH cohort on<br>glucocorticoids<br>(n = 254) | Matched<br>unexposed<br>cohort (n = 508) | CAH cohort not on<br>glucocorticoids<br>(n = 348) | Matched<br>unexposed<br>cohort (n = 696) |
|-----------------------------------------------------|-------------------------|-------------------------------------------|-----------------------------------------------|------------------------------------------|---------------------------------------------------|------------------------------------------|
| <b>Antibiotics prescriptions</b>                    |                         |                                           |                                               |                                          |                                                   |                                          |
| Count of prescriptions, n.                          | 3543                    | 4930                                      | 2134                                          | 2088                                     | 1409                                              | 2842                                     |
| Person-years                                        | 3941                    | 7957                                      | 1974                                          | 3611                                     | 1967                                              | 4346                                     |
| Count rates (per 1000 years)                        | 899                     | 619                                       | 1081                                          | 578                                      | 716                                               | 654                                      |
| Follow-up years, median (IQR)                       | 4.85 (1.95-10.32)       | 5.23 (2.09-9.90)                          | 6.12 (2.67-12.48)                             | 5.32 (2.54-10.87)                        | 4.12 (1.54-8.30)                                  | 5.20 (1.88-9.62)                         |
| Unadjusted incidence rate ratio (95% CI)            | 1.45 (1.39-1.51)        |                                           | 1.87 (1.76-1.99)                              |                                          | 1.10 (1.03-1.17)                                  |                                          |
| p-value                                             | p <0.001                |                                           | p <0.001                                      |                                          | p = 0.01                                          |                                          |
| Adjusted incidence rate ratio (95% CI) <sup>†</sup> | 1.46 (1.39-1.52)        |                                           | 1.77 (1.66-1.89)                              |                                          | 1.15 (1.08-1.23)                                  |                                          |
| p-value                                             | p <0.001                |                                           | p <0.001                                      |                                          | p <0.001                                          |                                          |
| <b>Antifungals prescriptions</b>                    |                         |                                           |                                               |                                          |                                                   |                                          |
| Count of prescriptions, n.                          | 302                     | 330                                       | 159                                           | 130                                      | 143                                               | 200                                      |
| Person-years                                        | 3941                    | 7957                                      | 1974                                          | 3611                                     | 1967                                              | 4346                                     |
| Count rates (per 1000 years)                        | 77                      | 41                                        | 81                                            | 36                                       | 73                                                | 46                                       |
| Follow-up years, median (IQR)                       | 4.85 (1.95-10.32)       | 5.23 (2.09-9.90)                          | 6.12 (2.67-12.48)                             | 5.32 (2.54-10.87)                        | 4.12 (1.54-8.30)                                  | 5.20 (1.88-9.62)                         |
| Unadjusted incidence rate ratio (95% CI)            | 1.85 (1.58-2.16)        |                                           | 2.24 (1.77-2.82)                              |                                          | 1.58 (1.27-1.96)                                  |                                          |
| p-value                                             | p <0.001                |                                           | p <0.001                                      |                                          | p <0.001                                          |                                          |
| Adjusted incidence rate ratio (95% CI) <sup>†</sup> | 1.69 (1.44-1.99)        |                                           | 1.91 (1.50-2.43)                              |                                          | 1.47 (1.18-1.83)                                  |                                          |
| p-value                                             | p <0.001                |                                           | p <0.001                                      |                                          | p <0.001                                          |                                          |

491 <sup>†</sup>Adjusted for age, gender, smoking status, BMI, Townsend Deprivation Index and Charlson Comorbidity Index.
